# Supplementary material for: Brain Structures and Their Association With Executive and Attentional Abilities in Very Preterm 8-Year-Old Children
Source: Research Square preprint supplement (doi:10.21203/rs.3.rs-6628445/v1), 2025-05-14
Supplement: Supplementary file 1 [file 8b144cdb44d50512137a5113.docx]

**Method**

**Factor Analysis**

***Exploratory factor analysis (EFA)***

**
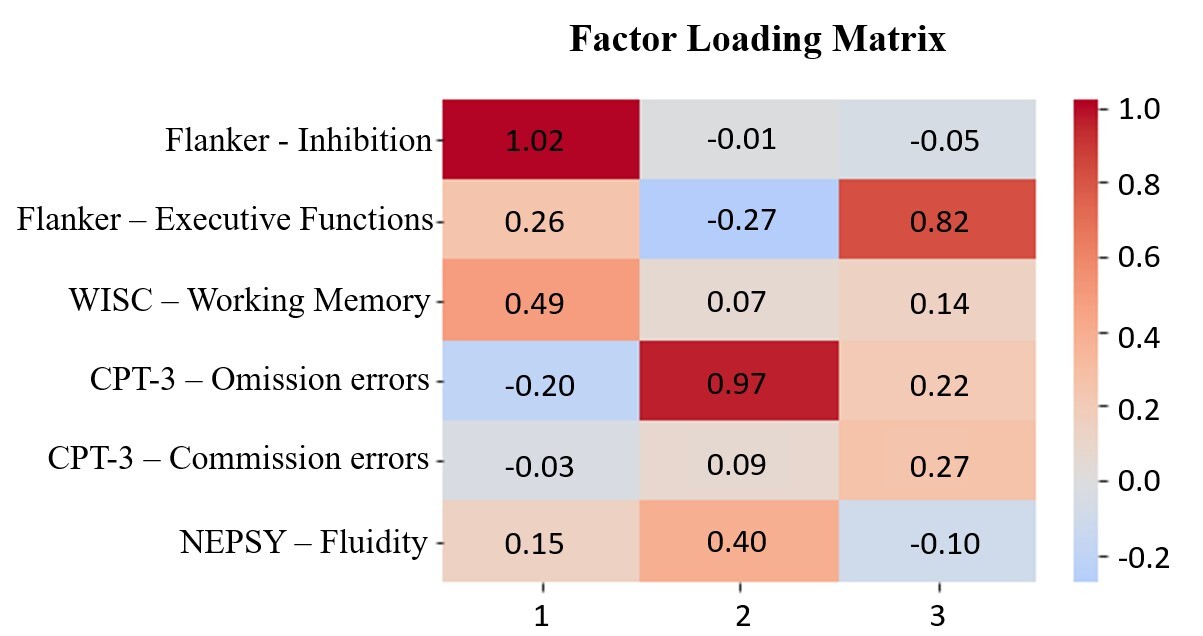
**

**Fig.1** Factor Loadings for the solution with 3 factors. The fraction of variance explained by Factor 1 was 0.228, by Factor 2 was 0.190 and by Factor 3 was 0.134. The total fraction of variance explained was 0.552.

**Data Analysis**

***Effect of Gender on the Three Factors and Cortical Thickness***

While the simple linear regressions showed a significant effect of gender on factor 1 (β = 0.19, p = 0.041) and factor 2 (β = 0.28, p = 0.011), no significant effect was found for factor 3 (β = 0.04, p = 0.786) and for thickness (β = 0.05, p = 0.43).


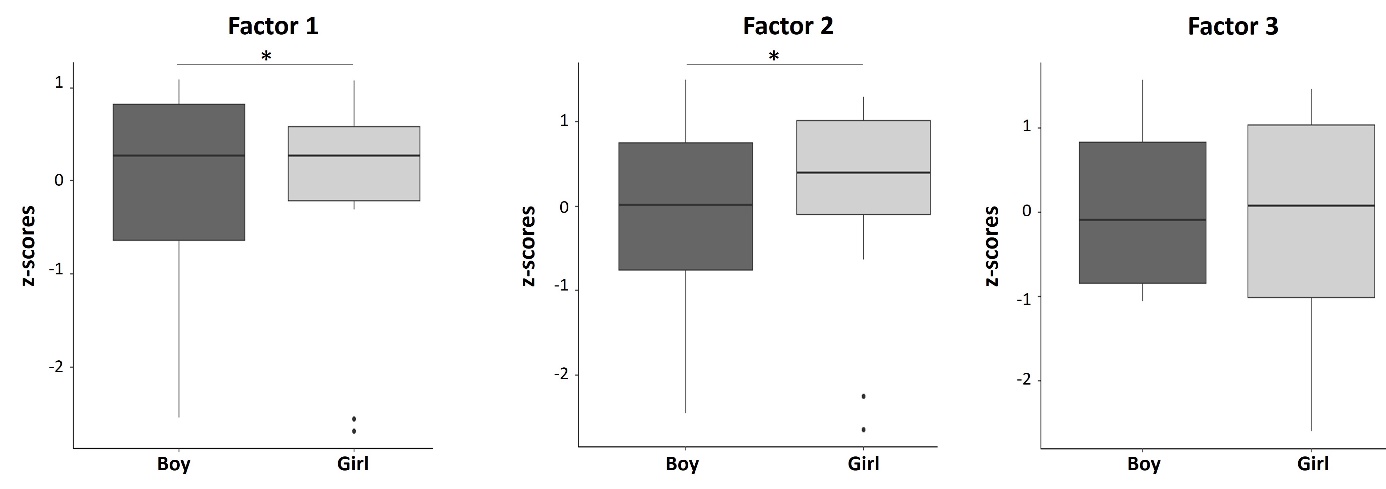


**Fig.2** Differences between boys and girls for the three factors. Note **p*<.05


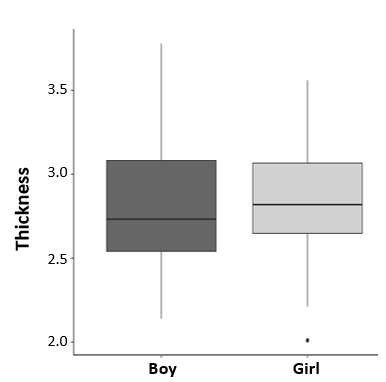


**Fig.3** Difference in cortical thickness between boys and girls

***Effect of Age on the Three Factors and Cortical Thickness***

The simple linear regressions showed no effect of Age on the different factors (i.e., factor 1(β = -0.11, p = 0.25), factor 2 (β = -0.04, p = 0.707), factor 3 (β = 0.23, p = 0.154)) and on thickness (β = 0.03, p = 0.47).


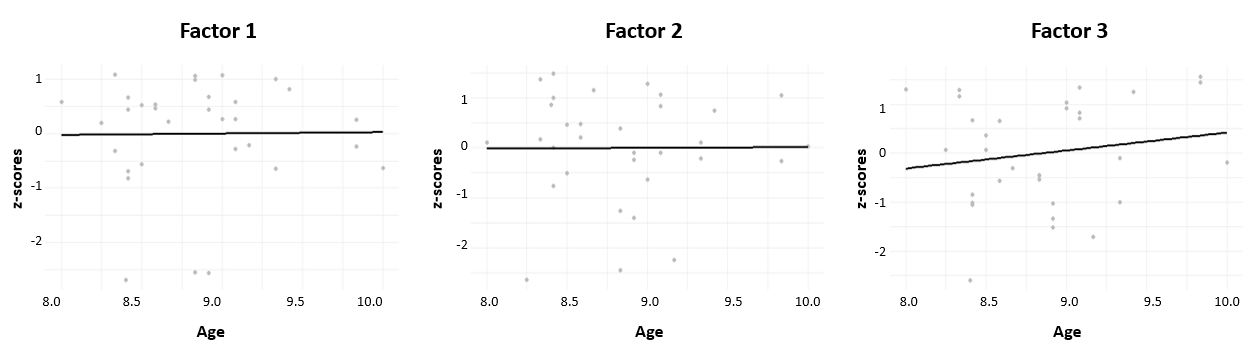


**Fig.4** Relations between age and the three factors


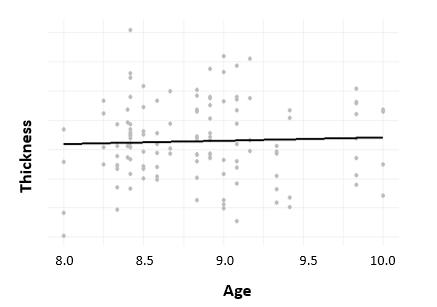


**Fig.5**. Relation between age and cortical thickness

**Results**

**Associations Between Executive and Attentional Functions and Brain Structures**

Theses correlations were adjusted for sex and age and corrected for multiple comparisons.

***Cortical Thickness***

|  | **Factor 1** | **Factor 2** | **Factor 3** |
| --- | --- | --- | --- |
| **Right DLPFC** | -0.362, p = .137 | -0.251, p = 0.241 | -0.481, p =.04* |
| **Left DLPFC** | -0.272, p = 0.225 | -0.158, p = 0.486 | -0.313, p = 0.184 |
| **Right ACC** | -0.352, p = 0.137 | -0.101, p = 0.650 | -0.269, p = 0.225 |
| **Left ACC** | -0.526. p = .036* | -0.465, p = .04* | -0.003, p = 0.987 |

**Table 1.** Correlation coefficients and adjusted p-values for cortical thickness

***Fractional Anisotropy***

|  | **Factor 1** | **Factor 2** | **Factor 3** |
| --- | --- | --- | --- |
| **Right DLPFC** | 0.035, p = 0.879 | -0.066, p = 0.879 | 0.063, p = 0.879 |
| **Left DLPFC** | 0.110, p = 0.879 | 0.100, p = 0.879 | 0.070, p = 0.879 |
| **Right ACC** | 0.058, p = p = 0.879 | -0.197, p = 0.879 | -0.195, p = 0.879 |
| **Left ACC** | 0.029, p = 0.879 | -0.447, 0.156 | -0.038, p = 0.879 |

**Table 2.** Correlation coefficients and adjusted p-values for fractional anisotropy

***Between Centrality***

|  | **Factor 1** | **Factor 2** | **Factor 3** |
| --- | --- | --- | --- |
| **Right DLPFC** | -0.227, p = 0.545 | 0.162, p = 0.672 | -0.065, p = 0.880 |
| **Left DLPFC** | -0.269, p = 0.545 | -0.364, p = 0.545 | -0.076, p=0.880 |
| **Right ACC** | -0.191, p = 0.622 | 0.003, p = 0.987 | -0.299, p =0.545 |
| **Left ACC** | 0.023, p = 0.986 | -0.246, p = 0.545 | -0.068, p = 0.880 |

**Table 3.** Correlation coefficients and adjusted p-values for between centrality

***Volume***

|  | **Factor 1** | **Factor 2** | **Factor 3** |
| --- | --- | --- | --- |
| **Right DLPFC** | -0.198, p = 0.711 | -0.041, p = 0.893 | -0.298, p = 0.711 |
| **Left DLPFC** | -0.026, p = 0.893 | -0.044, p = 0.893 | -0.179, p = 0.711 |
| **Right ACC** | -0.168, p = 0.711 | -0.138, p=0.711 | -0.052, p = 0.893 |
| **Left ACC** | -0.251, p = 0.711 | -0.136, p = 0.711 | -0.153, p = 0.711 |

**Table 4**. Correlation coefficients and adjusted p-values for volume

***Cortical Surface Area***

|  | **Factor 1** | **Factor 2** | **Factor 3** |
| --- | --- | --- | --- |
| **Right DLPFC** | -0.067, p = 0.888 | 0.076, p = 0. 888 | -0.098, p = 0. 888 |
| **Left DLPFC** | 0.103, p = 0.888 | -0.072, p = 0. 888 | -0.027, p = 0.888 |
| **Right ACC** | -0.079, p = 0. 888 | -0.127, p = 0. 888 | -0.061, p = 0. 888 |
| **Left ACC** | -0.092, p = 0. 888 | -0.036, p = 0. 888 | -0.149, p = 0. 888 |

**Table 5.** Correlation coefficients and adjusted p-values for cortical surface area
